# Supplementary material
Source: publisher site journal article supplement (https://www.dovepress.com/article/399021)
Supplement: Supplementary file 1 [file get_supplementary_file.php]

## Supplementary Material

**Supplement table 1.** Baseline characteristics of participants by NSE level

| Index                                 | Normal NSE (N=351)  | High NSE (N=80)     | Standardize diff.  | P-value |
|---------------------------------------|---------------------|---------------------|--------------------|---------|
| <b>Basic information</b>              |                     |                     |                    |         |
| Sex (men) (%)                         | 185 (52.71)         | 47 (58.75)          | 0.12 (-0.12, 0.36) | 0.328   |
| Age (years)                           | 72.36 ± 10.61       | 76.09 ± 11.39       | 0.34 (0.09, 0.58)  | 0.005   |
| Disease duration (hours)              | 7.00 (3.75-18.00)   | 7.00 (4.88-15.88)   | 0.08 (-0.16, 0.33) | 0.960   |
| <b>OCSP classification</b>            |                     |                     |                    |         |
| TACI (%)                              | 38 (10.83)          | 10 (12.50)          | 0.05 (-0.19, 0.30) | 0.668   |
| PACI (%)                              | 103 (29.34)         | 28 (35.00)          | 0.12 (-0.12, 0.36) | 0.321   |
| POCI (%)                              | 72 (20.51)          | 10 (12.50)          | 0.22 (-0.03, 0.46) | 0.099   |
| LACI (%)                              | 138 (39.32)         | 32 (40.00)          | 0.01 (-0.23, 0.26) | 0.910   |
| <b>Medical history</b>                |                     |                     |                    |         |
| Hypertension (%)                      | 308 (87.75)         | 74 (92.50)          | 0.16 (-0.08, 0.40) | 0.227   |
| Diabetes (%)                          | 124 (35.33)         | 25 (31.25)          | 0.09 (-0.16, 0.33) | 0.489   |
| CHD (%)                               | 90 (25.64)          | 29 (36.25)          | 0.23 (-0.01, 0.47) | 0.055   |
| Atrial fibrillation (%)               | 9 (2.56)            | 5 (6.25)            | 0.18 (-0.06, 0.42) | 0.093   |
| <b>Blood routine indicators</b>       |                     |                     |                    |         |
| Leukocyte count (10 <sup>12</sup> /L) | 6.93 ± 2.09         | 7.50 ± 2.12         | 0.27 (0.03, 0.51)  | 0.030   |
| RBC (10 <sup>12</sup> /L)             | 4.40 ± 0.60         | 4.38 ± 0.75         | 0.03 (-0.21, 0.27) | 0.807   |
| Platelet (10 <sup>9</sup> /L)         | 217.48 ± 64.75      | 232.28 ± 84.89      | 0.20 (-0.05, 0.44) | 0.084   |
| Hemoglobin (g/L)                      | 128.45 ± 19.71      | 127.66 ± 26.30      | 0.03 (-0.21, 0.28) | 0.763   |
| <b>Blood biochemical indicators</b>   |                     |                     |                    |         |
| ALT (U/L)                             | 17.30 (12.25-24.30) | 16.05 (11.35-20.90) | 0.15 (-0.09, 0.40) | 0.250   |
| Total bilirubin (μmol/L)              | 11.80 (8.50-15.60)  | 12.40 (9.30-18.45)  | 0.31 (0.06, 0.55)  | 0.002   |
| Total protein (g/L)                   | 68.48 ± 7.65        | 68.95 ± 9.34        | 0.05 (-0.19, 0.30) | 0.636   |
| Albumin (g/L)                         | 40.35 ± 4.89        | 40.10 ± 6.18        | 0.05 (-0.20, 0.29) | 0.693   |
| Uric acid (μmol/L)                    | 288.55 ± 100.71     | 299.82 ± 122.81     | 0.10 (-0.14, 0.34) | 0.387   |
| Creatinine (μmol/L)                   | 76.45 ± 30.31       | 94.69 ± 61.15       | 0.38 (0.13, 0.62)  | 0.032   |

|                                        |                     |                     |                    |        |
|----------------------------------------|---------------------|---------------------|--------------------|--------|
| BUN (mmol/L)                           | 5.50 (4.50-6.70)    | 5.55 (4.40-6.93)    | 0.34 (0.10, 0.59)  | <0.001 |
| HCY ( $\mu$ mol/L)                     | 13.00 (8.00-20.00)  | 16.00 (8.75-25.25)  | 0.29 (0.05, 0.54)  | 0.078  |
| ESR (mm/h)                             | 22.00 (11.00-30.00) | 20.50 (11.75-26.25) | 0.02 (-0.23, 0.26) | 0.545  |
| LDL-C (mmol/L)                         | 2.80 $\pm$ 0.97     | 3.01 $\pm$ 1.00     | 0.21 (-0.03, 0.46) | 0.085  |
| HDL-C (mmol/L)                         | 1.24 $\pm$ 0.32     | 1.28 $\pm$ 0.42     | 0.10 (-0.14, 0.34) | 0.383  |
| TG (mmol/L)                            | 1.36 $\pm$ 0.94     | 1.35 $\pm$ 0.70     | 0.01 (-0.23, 0.25) | 0.934  |
| TCH (mmol/L)                           | 4.43 $\pm$ 1.06     | 4.64 $\pm$ 1.10     | 0.19 (-0.05, 0.44) | 0.113  |
| Fasting glucose (mmol/L)               | 6.05 $\pm$ 1.82     | 6.24 $\pm$ 1.99     | 0.10 (-0.14, 0.34) | 0.408  |
| NSE (ng/mL)                            | 12.41 $\pm$ 2.17    | 18.69 $\pm$ 2.11    | 2.94 (2.62, 3.25)  | <0.001 |
| <b>Clotting index</b>                  |                     |                     |                    |        |
| D-dimer (ug/ml)                        | 0.38 (0.22-0.80)    | 0.43 (0.27-1.18)    | 0.12 (-0.13, 0.36) | 0.080  |
| PT (second)                            | 10.92 $\pm$ 0.77    | 11.31 $\pm$ 1.24    | 0.38 (0.13, 0.62)  | <0.001 |
| PTT (second)                           | 27.36 $\pm$ 3.78    | 28.57 $\pm$ 4.24    | 0.30 (0.06, 0.54)  | 0.012  |
| Fibrinogen (g/L)                       | 2.88 $\pm$ 0.79     | 3.27 $\pm$ 0.88     | 0.47 (0.22, 0.71)  | <0.001 |
| <b>Tumor index</b>                     |                     |                     |                    |        |
| AFP (ng/ml)                            | 1.90 (1.00-2.85)    | 1.60 (0.70-2.60)    | 0.11 (-0.13, 0.36) | 0.170  |
| CEA (ng/ml)                            | 1.52 (0.91-2.33)    | 1.33 (0.85-2.37)    | 0.07 (-0.18, 0.31) | 0.292  |
| CA153 (u/ml)                           | 7.40 (6.00-10.60)   | 8.05 (5.77-13.37)   | 0.14 (-0.10, 0.39) | 0.298  |
| CA724 (u/ml)                           | 1.81 (1.07-3.87)    | 2.30 (1.58-5.94)    | 0.14 (-0.10, 0.38) | 0.007  |
| <b>Medication use before admission</b> |                     |                     |                    |        |
| Antihypertensive drugs (%)             | 290 (82.62)         | 70 (87.50)          | 0.14 (-0.11, 0.38) | 0.288  |
| Lipid lowering drugs (%)               | 135 (38.46)         | 34 (42.50)          | 0.08 (-0.16, 0.33) | 0.504  |
| Antidiabetic drugs (%)                 | 116 (33.05)         | 23 (28.75)          | 0.09 (-0.15, 0.34) | 0.458  |
| Antiplatelet drugs (%)                 | 300 (85.47)         | 69 (86.25)          | 0.02 (-0.22, 0.27) | 0.858  |

---

AFP: Alpha-fetoprotein, ALT: Alanine aminotransferase, BUN: Blood urea nitrogen, CEA: Carcinoembryonic antigen, CA: Cancer, CHD: Coronary heart disease, ESR: Erythrocyte sedimentation rate, HCY: Hemocyanin, HDL-C: High density lipoprotein cholesterol, INR: International normalized ratio, LACI: Lacunar infarction, LDL-C: Low density lipoprotein, NSE: Neuron-specific enolase, OCSF: Oxfordshire community stroke project, PACI: Partial anterior circulation infarction, POCI: posterior circulation infarction, PT: Prothrombin time, PTT: Partial thromboplastin time, RBC: Red blood cell, TACI: Total anterior circulation infarction, TCH: Total cholesterol, TG: Triglyceride.

**Supplement table 2.** Baseline characteristics of participants by fibrinogen level

| <b>Index</b>                          | <b>Normal fibrinogen group (N=388)</b> | <b>High fibrinogen group (N=43)</b> | <b>Standardize diff</b> | <b>P-value</b> |
|---------------------------------------|----------------------------------------|-------------------------------------|-------------------------|----------------|
| <b>Basic information</b>              |                                        |                                     |                         |                |
| Sex (men) (%)                         | 209 (53.87)                            | 23 (53.49)                          | 0.01 (-0.31, 0.32)      | 0.962          |
| Age (years)                           | 72.55±10.93                            | 77.58±8.94                          | 0.50 (0.19, 0.82)       | 0.004          |
| Disease duration (hours)              | 7.00 (3.88-17.25)                      | 8.00 (5.50-17.50)                   | 0.10 (-0.22, 0.41)      | 0.185          |
| <b>OCSP classification</b>            |                                        |                                     |                         |                |
| TACI (%)                              | 45 (11.60)                             | 3 (6.98)                            | 0.16 (-0.16, 0.47)      | 0.361          |
| PACI (%)                              | 114 (29.38)                            | 17 (39.53)                          | 0.21 (-0.10, 0.53)      | 0.170          |
| POCI (%)                              | 75 (19.33)                             | 7 (16.28)                           | 0.08 (-0.24, 0.39)      | 0.629          |
| LACI (%)                              | 154 (39.69)                            | 16 (37.21)                          | 0.05 (-0.26, 0.37)      | 0.752          |
| <b>Medical history</b>                |                                        |                                     |                         |                |
| Hypertension (%)                      | 342 (88.14)                            | 40 (93.02)                          | 0.17 (-0.15, 0.48)      | 0.339          |
| Diabetes (%)                          | 133 (34.28)                            | 16 (37.21)                          | 0.06 (-0.25, 0.38)      | 0.701          |
| CHD (%)                               | 103 (26.55)                            | 16 (37.21)                          | 0.23 (-0.09, 0.55)      | 0.138          |
| Atrial fibrillation (%)               | 13 (3.35)                              | 1 (2.33)                            | 0.06 (-0.25, 0.38)      | 0.719          |
| <b>Blood routine indicators</b>       |                                        |                                     |                         |                |
| Leukocyte count (10 <sup>12</sup> /L) | 6.87±1.98                              | 8.59±2.61                           | 0.74 (0.42, 1.06)       | <0.001         |
| Women (10 <sup>12</sup> /L)           | 6.82±2.07                              | 8.43±3.09                           | 0.61 (0.14, 1.08)       | 0.002          |
| Men (10 <sup>12</sup> /L)             | 6.91±1.89                              | 8.73±2.17                           | 0.89 (0.46, 1.33)       | <0.001         |
| High leukocyte (%)                    | 25 (6.44)                              | 16 (37.21)                          | 0.80 (0.48, 1.12)       | <0.001         |
| Neutrophil count (10 <sup>9</sup> /L) | 4.43±1.73                              | 6.37±3.13                           | 0.77 (0.45, 1.09)       | <0.001         |
| Monocyte count (10 <sup>9</sup> /L)   | 0.41 (0.34-0.52)                       | 0.46 (0.34-0.68)                    | 0.49 (0.17, 0.80)       | 0.018          |
| Lymphocyte count (10 <sup>9</sup> /L) | 1.73 (1.36-2.30)                       | 1.57 (1.36-2.26)                    | 0.09 (-0.23, 0.40)      | 0.421          |
| RBC (10 <sup>12</sup> /L)             | 4.41±0.62                              | 4.29±0.71                           | 0.18 (-0.14, 0.49)      | 0.238          |
| Platelet (10 <sup>9</sup> /L)         | 215.94±65.0                            | 258.95±90.43                        | 0.55 (0.23, 0.86)       | <0.001         |
| Hemoglobin (g/L)                      | 128.96±20.42                           | 122.37±25.58                        | 0.28 (-0.03, 0.60)      | 0.051          |
| <b>Blood biochemical indicators</b>   |                                        |                                     |                         |                |

|                                        |                     |                     |                    |        |
|----------------------------------------|---------------------|---------------------|--------------------|--------|
| ALT (U/L)                              | 16.65 (12.00-24.33) | 18.00 (11.75-21.10) | 0.00 (-0.31, 0.32) | 0.711  |
| Total bilirubin (µmol/L)               | 11.85 (8.80-15.60)  | 13.00 (8.00-17.90)  | 0.23 (-0.08, 0.55) | 0.662  |
| Total protein (g/L)                    | 68.62±7.96          | 68.08±8.22          | 0.07 (-0.25, 0.38) | 0.674  |
| Albumin (g/L)                          | 40.52±5.12          | 38.35±5.0           | 0.43 (0.11, 0.75)  | 0.008  |
| Uric acid (µmol/L)                     | 292.23±101.30       | 276.37±135.27       | 0.13 (-0.18, 0.45) | 0.349  |
| Creatinine (µmol/L)                    | 79.70±38.26         | 81.08±41.42         | 0.03 (-0.28, 0.35) | 0.823  |
| BUN (mmol/L)                           | 5.40 (4.50-6.60)    | 6.40 (4.75-7.10)    | 0.28 (-0.03, 0.60) | 0.073  |
| HCY (µmol/L)                           | 13.00 (8.00-20.00)  | 14.00 (10.00-18.50) | 0.00 (-0.31, 0.32) | 0.606  |
| ESR (mm/h)                             | 21.50 (11.00-29.00) | 26.00 (15.00-34.50) | 0.33 (0.01, 0.64)  | 0.059  |
| LDL-C (mmol/L)                         | 2.83±0.98           | 2.88±0.93           | 0.04 (-0.27, 0.36) | 0.794  |
| HDL-C (mmol/L)                         | 1.25±0.34           | 1.26±0.35           | 0.04 (-0.28, 0.35) | 0.815  |
| TG (mmol/L)                            | 1.36±0.91           | 1.28±0.77           | 0.10 (-0.22, 0.42) | 0.560  |
| TCH (mmol/L)                           | 4.47±1.08           | 4.44±0.96           | 0.03 (-0.28, 0.35) | 0.845  |
| Fasting glucose (mmol/L)               | 6.11±1.89           | 5.86±1.49           | 0.15 (-0.17, 0.46) | 0.400  |
| NSE (ng/mL)                            | 13.51±3.17)         | 14.19±3.99          | 0.19 (-0.12, 0.51) | 0.190  |
| <b>Clotting index</b>                  |                     |                     |                    |        |
| D-dimer (ug/ml)                        | 0.38 (0.22-0.80)    | 0.72 (0.45-1.48)    | 0.33 (0.01, 0.64)  | <0.001 |
| PT (second)                            | 10.97±0.83          | 11.27±1.25          | 0.28 (-0.03, 0.60) | 0.034  |
| PTT (second)                           | 27.41±3.81          | 29.10±4.33          | 0.42 (0.10, 0.73)  | 0.007  |
| Fibrinogen (g/L)                       | 2.75±0.58           | 4.71±0.48           | 3.66 (3.26, 4.06)  | <0.001 |
| Women (g/L)                            | 2.86±0.60           | 4.64±0.40           | 3.47 (2.90, 4.05)  | <0.001 |
| Men (g/L)                              | 2.66±0.55           | 4.77±0.54           | 3.86 (3.30, 4.41)  | <0.001 |
| <b>Tumor index</b>                     |                     |                     |                    |        |
| AFP (ng/ml)                            | 1.80 (1.00-2.82)    | 1.50 (0.65-2.50)    | 0.35 (0.03, 0.66)  | 0.100  |
| CEA (ng/ml)                            | 1.46 (0.88-2.24)    | 1.96 (1.11-2.45)    | 0.05 (-0.26, 0.37) | 0.088  |
| CA153 (u/ml)                           | 7.50 (6.00-10.60)   | 8.00 (5.30-12.70)   | 0.24 (-0.07, 0.56) | 0.554  |
| CA724 (u/ml)                           | 1.98 (1.11-3.97)    | 2.03 (1.09-6.02)    | 0.03 (-0.28, 0.35) | 0.487  |
| <b>Medication use before admission</b> |                     |                     |                    |        |
| Antihypertensive drugs (%)             | 324 (83.51)         | 36 (83.72)          | 0.01 (-0.31, 0.32) | 0.971  |

|                          |             |            |                    |       |
|--------------------------|-------------|------------|--------------------|-------|
| Lipid lowering drugs (%) | 148 (38.14) | 21 (48.84) | 0.22 (-0.10, 0.53) | 0.173 |
| Antidiabetic drugs (%)   | 123 (31.70) | 16 (37.21) | 0.12 (-0.20, 0.43) | 0.463 |
| Antiplatelet drugs (%)   | 330 (85.05) | 39 (90.70) | 0.17 (-0.14, 0.49) | 0.317 |

---

AFP: Alpha-fetoprotein, ALT: Alanine aminotransferase, BUN: Blood urea nitrogen, CEA: Carcinoembryonic antigen, CA: Cancer, CHD: Coronary heart disease, ESR: Erythrocyte sedimentation rate, HCY: Hemocyanin, HDL-C: High density lipoprotein cholesterol, INR: International normalized ratio, LACI: Lacunar infarction, LDL-C: Low density lipoprotein, NSE: Neuron-specific enolase, OCSF: Oxfordshire community stroke project, PACI: Partial anterior circulation infarction, POCI: posterior circulation infarction, PT: Prothrombin time, PTT: Partial thromboplastin time, RBC: Red blood cell, TACI: Total anterior circulation infarction, TCH: Total cholesterol, TG: Triglyceride.

**Supplement Table 3.** Characteristics of AIS and healthy control groups after propensity score matching by sex and age

| <b>Characteristic</b>                 | <b>Healthy control (N=89)</b> | <b>AIS (N=89)</b> | <b>Standardize diff</b> | <b>P-value</b> |
|---------------------------------------|-------------------------------|-------------------|-------------------------|----------------|
| <b>Basic information</b>              |                               |                   |                         |                |
| Sex (men) (%)                         | 36(40.45)                     | 41(46.07)         | 0.11(-0.18,0.41)        | 0.449          |
| Age (years)                           | 68.31±9.01                    | 67.75±10.79       | 0.06(-0.24,0.35)        | 0.707          |
| <b>Laboratory tests</b>               |                               |                   |                         |                |
| Leukocyte count (10 <sup>12</sup> /L) | 6.11±1.81                     | 7.27±2.36         | 0.55(0.25,0.85)         | <0.001         |
| Fibrinogen (g/L)                      | 2.66±0.65                     | 2.94±0.81         | 0.38(0.08,0.68)         | 0.012          |
| NSE (ng/mL)                           | 12.79±3.70                    | 14.07±3.13        | 0.37 (0.08, 0.67)       | 0.014          |
| <b>Medical history</b>                |                               |                   |                         |                |
| Hypertension (%)                      | /                             | 76(85.39)         | /                       | /              |
| Diabetes (%)                          | /                             | 34(38.20)         | /                       | /              |
| CHD (%)                               | /                             | 15(16.85)         | /                       | /              |
| Atrial fibrillation (%)               | /                             | 0 (0.00)          | /                       | /              |

AIS: acute ischemic stroke, CHD: coronary heart disease

**Supplement Table 4.** Hierarchical analysis on relationship of leukocyte and high NSE

| <b>Hierarchical factor</b> |       | <b>N</b> | <b>OR (95% CI) <i>p</i></b> | <b><i>p</i> for interaction</b> |
|----------------------------|-------|----------|-----------------------------|---------------------------------|
| Sex (%)                    | Women | 199      | 1.09 (0.90, 1.32) 0.369     | 0.273                           |
|                            | Men   | 232      | 1.26 (1.05, 1.51) 0.011     |                                 |
| Age (years)                | <75   | 239      | 1.21 (1.01, 1.46) 0.041     | 0.293                           |
|                            | ≥75   | 192      | 1.06 (0.90, 1.25) 0.483     |                                 |
| CHD (%)                    | No    | 312      | 1.17 (1.01, 1.35) 0.041     | 0.552                           |
|                            | Yes   | 119      | 1.07 (0.85, 1.36) 0.563     |                                 |
| RBC (10 <sup>12</sup> /L)  | <5.0  | 366      | 1.08 (0.94, 1.24) 0.270     | 0.193                           |
|                            | ≥5.0  | 65       | 1.36 (0.98, 1.87) 0.065     |                                 |
| Creatinine (μmol/L)        | <72   | 215      | 1.16 (1.02, 1.32) 0.020     | 0.719                           |
|                            | ≥72   | 216      | 1.01 (0.48, 2.13) 0.982     |                                 |
| BUN (mmol/L)               | <5.50 | 209      | 1.21 (1.00, 1.46) 0.045     | 0.537                           |
|                            | ≥5.50 | 221      | 1.12 (0.95, 1.32) 0.170     |                                 |
| HCY (μmol/L)               | <15.0 | 229      | 1.16 (0.99, 1.36) 0.065     | 0.642                           |
|                            | ≥15.0 | 202      | 1.10 (0.94, 1.29) 0.225     |                                 |
| LDL-C (mmol/L)             | <3.10 | 272      | 1.16 (0.99, 1.36) 0.074     | 0.763                           |
|                            | ≥3.10 | 159      | 1.11 (0.92, 1.35) 0.267     |                                 |
| Fasting glucose (mmol/L)   | <6.10 | 275      | 1.12 (0.95, 1.30) 0.168     | 0.563                           |
|                            | ≥6.10 | 156      | 1.21 (0.97, 1.50) 0.090     |                                 |

Each stratification adjusted for all the factors (sex, age, CHD, RBC, creatinine, BUN, HCY, LDL-C, fasting glucose) except the stratification factor itself.

**Supplement Table 5.** Hierarchical analysis on relationship of leukocyte and high fibrinogen

| Hierarchical factor                   |        | N   | OR (95% CI) <i>p</i>     | <i>p</i> for interaction |
|---------------------------------------|--------|-----|--------------------------|--------------------------|
| Sex (%)                               | Women  | 199 | 1.29 (1.01, 1.64) 0.038  | 0.419                    |
|                                       | Men    | 232 | 1.47 (1.18, 1.85) <0.001 |                          |
| Age (years)                           | <75    | 239 | 1.32 (1.03, 1.70) 0.027  | 0.817                    |
|                                       | ≥75    | 192 | 1.37 (1.13, 1.67) 0.001  |                          |
| Diabetes (%)                          | No     | 282 | 1.34 (1.09, 1.65) 0.005  | 0.299                    |
|                                       | Yes    | 149 | 1.63 (1.19, 2.22) 0.002  |                          |
| Lymphocyte count (10 <sup>9</sup> /L) | <1.73  | 214 | 1.50 (1.20, 1.89) <0.001 | 0.481                    |
|                                       | ≥1.73  | 217 | 1.33 (1.04, 1.71) 0.024  |                          |
| Platelets (10 <sup>9</sup> /L)        | <209   | 215 | 1.56 (1.18, 2.07) 0.001  | 0.273                    |
|                                       | ≥209   | 216 | 1.29 (1.06, 1.57) 0.010  |                          |
| ALT (U/L)                             | <16.90 | 215 | 1.29 (1.03, 1.62) 0.027  | 0.493                    |
|                                       | ≥16.90 | 216 | 1.44 (1.15, 1.81) 0.001  |                          |
| BUN (mmol/L)                          | <5.50  | 209 | 1.53 (1.15, 2.03) 0.003  | 0.467                    |
|                                       | ≥5.50  | 221 | 1.34 (1.11, 1.62) 0.002  |                          |
| LDL-C (mmol/L)                        | <3.10  | 272 | 1.40 (1.15, 1.70) 0.001  | 0.668                    |
|                                       | ≥3.10  | 159 | 1.30 (0.97, 1.73) 0.079  |                          |
| Fasting glucose (mmol/L)              | <6.10  | 275 | 1.25 (1.03, 1.52) 0.021  | 0.078                    |
|                                       | ≥6.10  | 156 | 1.79 (1.23, 2.60) 0.002  |                          |
| Lipid lowering drugs (%)              | No     | 262 | 1.29 (1.03, 1.60) 0.025  | 0.334                    |
|                                       | Yes    | 169 | 1.50 (1.18, 1.92) 0.001  |                          |
| Antiplatelet drugs (%)                | No     | 62  | 1.21 (0.77, 1.89) 0.409  | 0.601                    |
|                                       | Yes    | 369 | 1.37 (1.16, 1.63) <0.001 |                          |

Each stratification adjusted for all the factors (sex, age, diabetes, lymphocyte count, platelet, ALT, BUN, LDL-C, fasting glucose, lipid lowering drugs, and antiplatelet drugs) except the stratification factor itself.



Supplement figure 1.

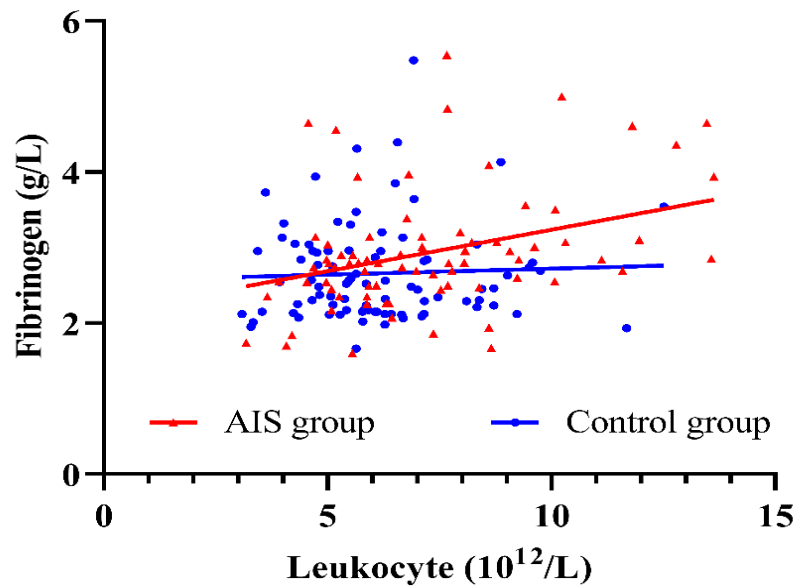

Person's correlation between leukocyte and fibrinogen in the AIS and healthy control groups, respectively. The Person's correlation coefficient (95%) for the relationship between leukocytes and fibrinogen were 0.321 (0.121-0.496,  $p=0.002$ ) in the matched AIS group, and 0.045 (-0.165-0.251,  $p=0.676$ ) in the healthy control group. Which showed that the level of fibrinogen was observed increasing with the elevated level of leukocyte in the matched AIS group, but not in the healthy control group.

Supplement figure 2.

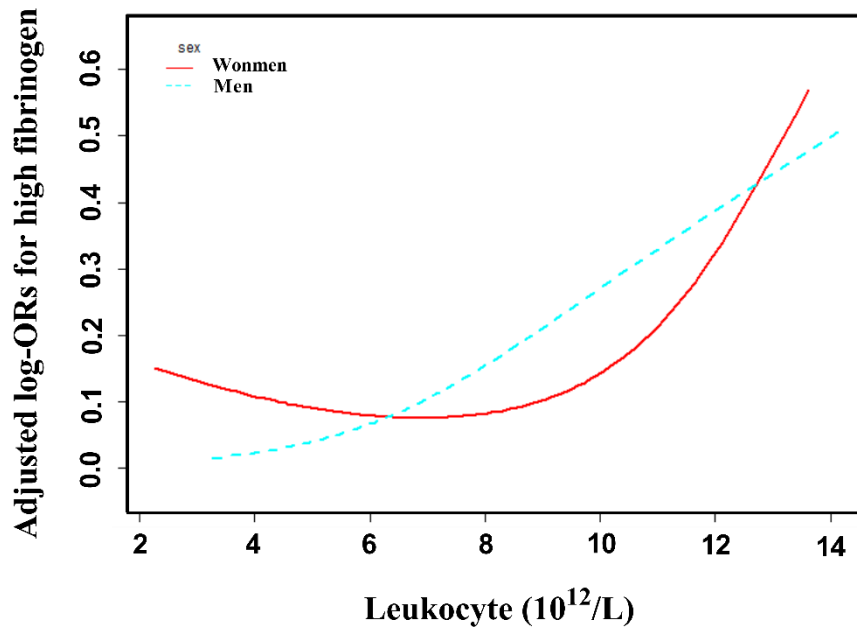

**Linear curve fitting of the relationship between leukocyte and high fibrinogen.** A hierarchical analysis by sex showed linear relationships between leukocyte and high fibrinogen in women ( $p=0.027$ ) and men ( $p<0.001$ ) after adjusting for sex, age, diabetes, lymphocyte count, platelet, ALT, BUN, LDL-C, fasting glucose, lipid lowering drugs, and antiplatelet drugs, respectively.
